# Supplementary material for: A superhydrophobic and elastic melamine sponge for oil/water separation
Source: Royal Society of Chemistry journal article supplement (doi:10.1039/c9nj00447e), 2019-01-01
Supplement: c9nj00447e1.pdf [file c9nj00447e1.pdf]

## Supplementary information

### **Superhydrophobic and elastic melamine sponge for oil/water separation**

Ying Zhang<sup>a,b</sup>, Qian Zhang<sup>a,b</sup>, Ruiyang Zhang<sup>b</sup>, Shuaizhuo Liu<sup>b</sup>, Ying Zhou<sup>a,b\*</sup>

a State Key Laboratory of Oil and Gas Reservoir Geology and Exploitation,  
Southwest Petroleum University, Chengdu 610500, China

b The Center of New Energy Materials and Technology, School of Materials Science  
and Engineering, Southwest Petroleum University, Chengdu 610500, China

Fax: +86 28 83037406; Tel: +86 28 83037401

E-mail: [yzhou@swpu.edu.cn](mailto:yzhou@swpu.edu.cn)

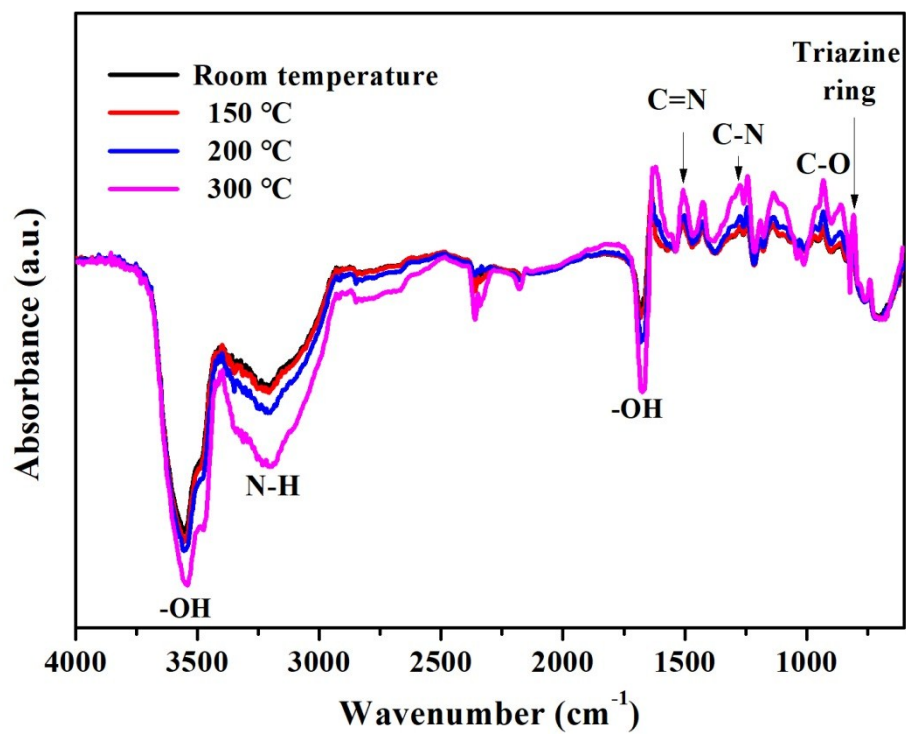

Fig. S1 In situ DRIFTS measurements of MS at different temperatures.

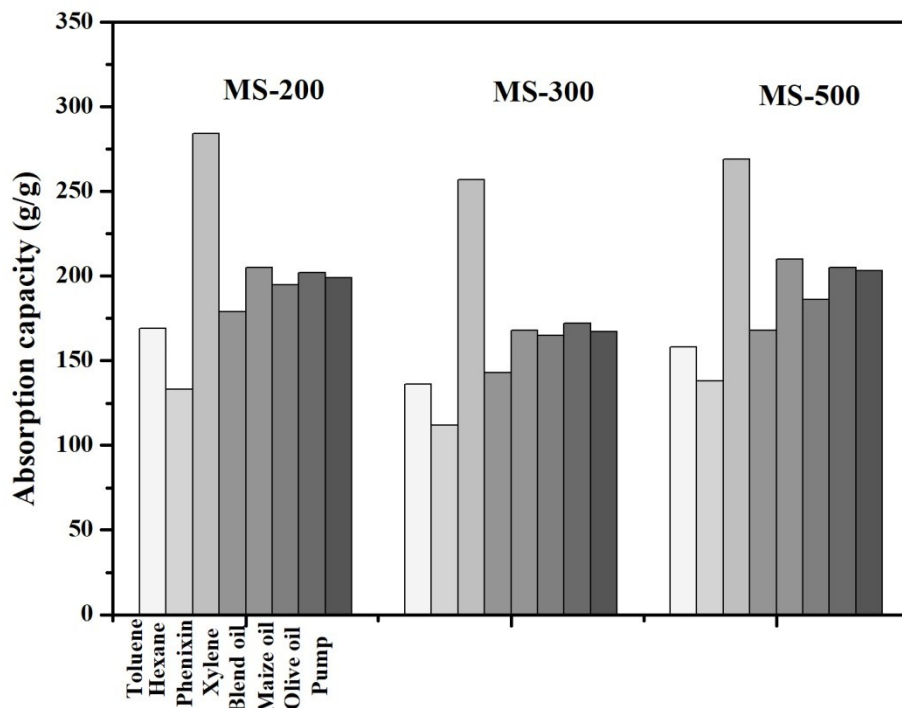

**Fig. S2** Adsorption capacities for various organic solvents and oils for different samples: MS-200, MS-300 and MS-500.

**Table. S1** The comparison of adsorption capacity of various adsorbents.

| Adsorbents                                          | Q <sub>wt</sub><br>(g/g) | Contact angle<br>(°) | Cycle times | References |
|-----------------------------------------------------|--------------------------|----------------------|-------------|------------|
| Graphene-carbon<br>nanotube sponge                  | 215-743                  | 132.9                | >10         | [1]        |
| Carbon foam                                         | 148-411                  | /                    | 10          | [2]        |
| Superhydrophobic<br>melamine sponge                 | 133-284                  | 168                  | >50         | This work  |
| Melamine-derived<br>carbon sponge                   | 90-200                   | 140                  | /           | [3]        |
| Carbon nanotube<br>sponge                           | 80-180                   | 156                  | /           | [4]        |
| Reduced graphene<br>oxide melamine<br>sponge        | 80-161                   | 153                  | >50         | [5]        |
| Trichlorosilane on<br>carbonized<br>melamine sponge | 71-158                   | 145.4                | 5           | [6]        |

1. H. Sun, Z. Xu and C. Gao, *Adv. Mater.*, 2013, **25**, 2554.
2. S. Chen, G. He, H. Hu, S. Jin, Y. Zhou, Y. He, S. He, F. Zhao and H. Hou, *Energy Environ. Sci.*, 2013, **6**, 2435-2439.
3. A. Stolz, S. L Floch, L. Reinert, S. M. M. Ramos, J. Tuillon-Combes, Y. Soneda, P. Chaudet, D. Baillis, N. Blanchard, L. Duclaux and A. San-Miguel, *Carbon*, 2016, **107**, 198-208.
4. X. Gui, J. Wei, K. Wang, A. Cao, H. Zhu, Y. Jia, Q. Shu and D. Wu, *Adv. Mater.*, 2010, **22**, 617-621.
5. L. Qiu, R. Zhang, Y. Zhang, C. Li, Q. Zhang and Y. Zhou, *Front. Chem. Sci. Eng.*, 2018, **12**, 390-399.
6. Y. Yang, Y. Deng, Z. Tong and C. Wang, *J. Mater. Chem. A*, 2014, **2**, 9994-9999.
